# Supplementary material
Source: PubMed Central journal article supplement (PMC3668487)
Supplement: supp_blood-2012-12-474577_blood-2012-12-474577-1.pdf [file supp_blood-2012-12-474577_blood-2012-12-474577-1.pdf]

# Supplementary Figure 1

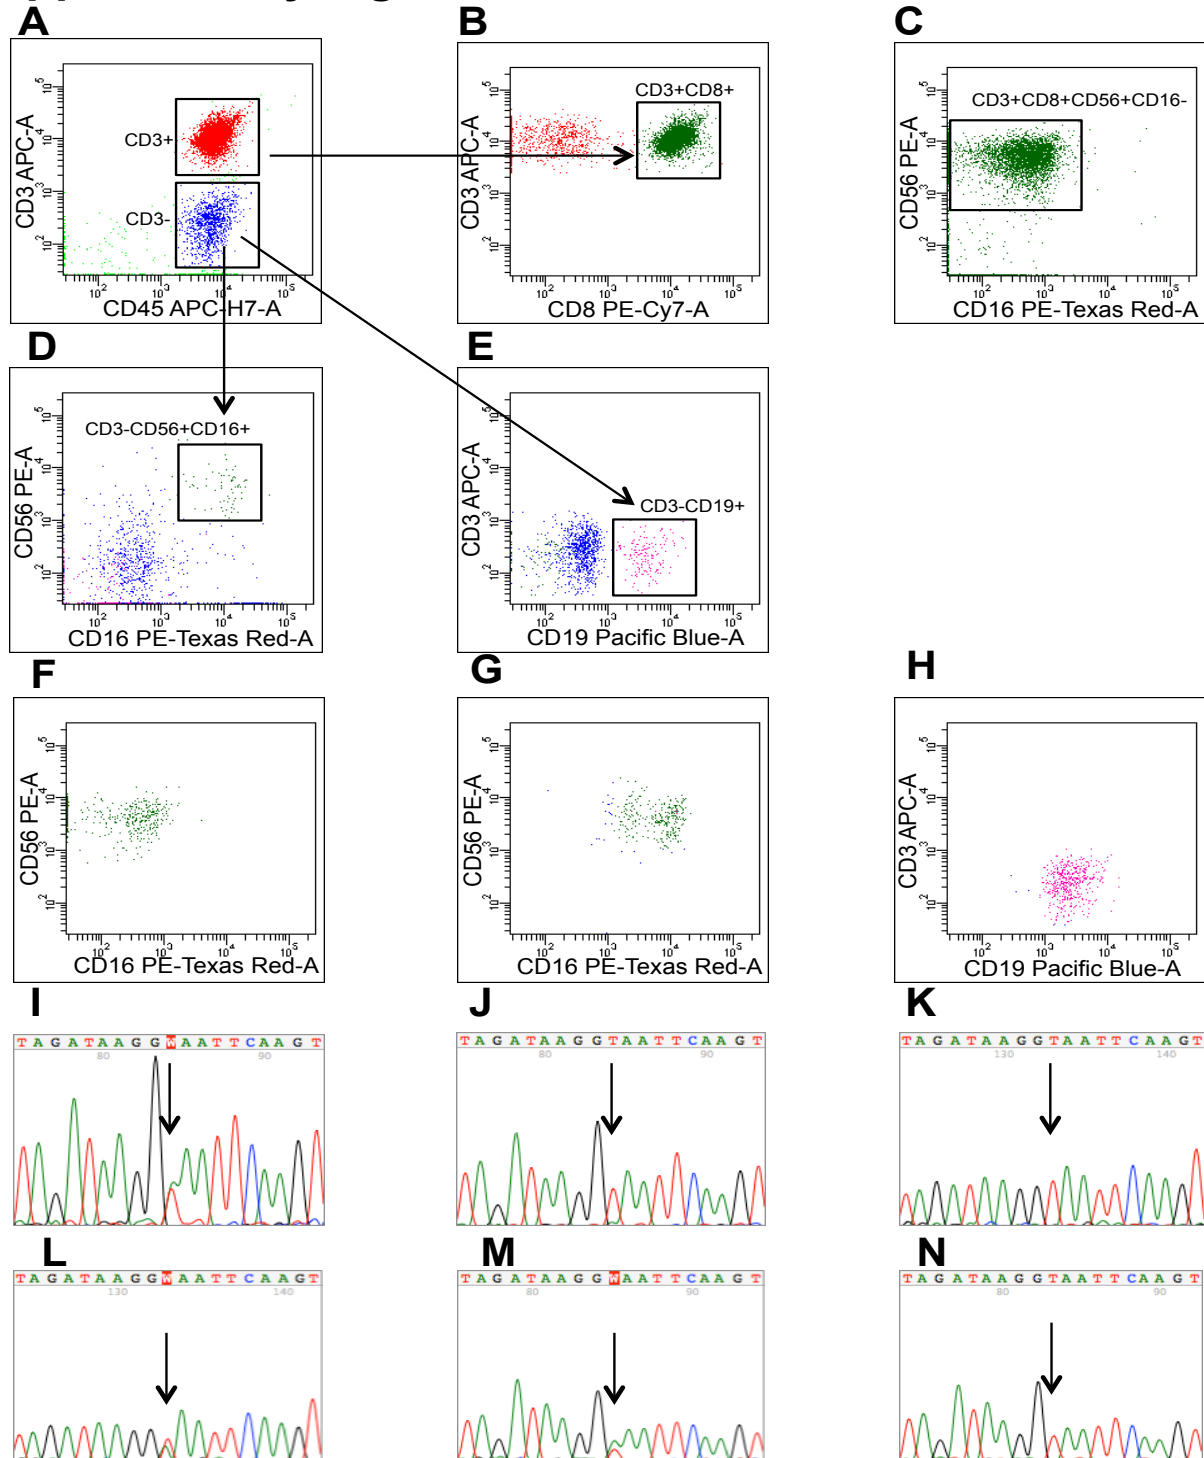

**Supplementary Figure 1. STAT5b sequencing from sorted fractions of patient 1 and STAT5b sequencing results of patient 1 and 2.**

CD3+CD8+CD56+ leukemic LGLs (A-C), CD3<sup>neg</sup>CD16+CD56+NK-cells (D), and CD3<sup>neg</sup>CD19+ B-cells (E) were sorted from patient 1 with STAT5b mutation Y665F. Approximately 83% of patient 1's CD3+CD8+ cells expressed also CD56, but not CD16. Panels F-G represent the purity of sorted fractions: leukemic LGLs (F), NK-cells (G), and B-cells (H). STAT5b mutation Y665F is seen in CD8+CD56+ cells DNA (I), but not in NK-cells (G) or B-cells (H). Similar gating and sorting strategy was done with patient 2's sample (flow cytometry results not shown). Mutation Y665F is visible in CD3+CD8+CD56+ DNA (L), and surprisingly, also in CD3<sup>neg</sup>CD16+CD56+ NK-cell DNA (M). B-cells show only wild-type allele (N).

## Supplementary Figure 2

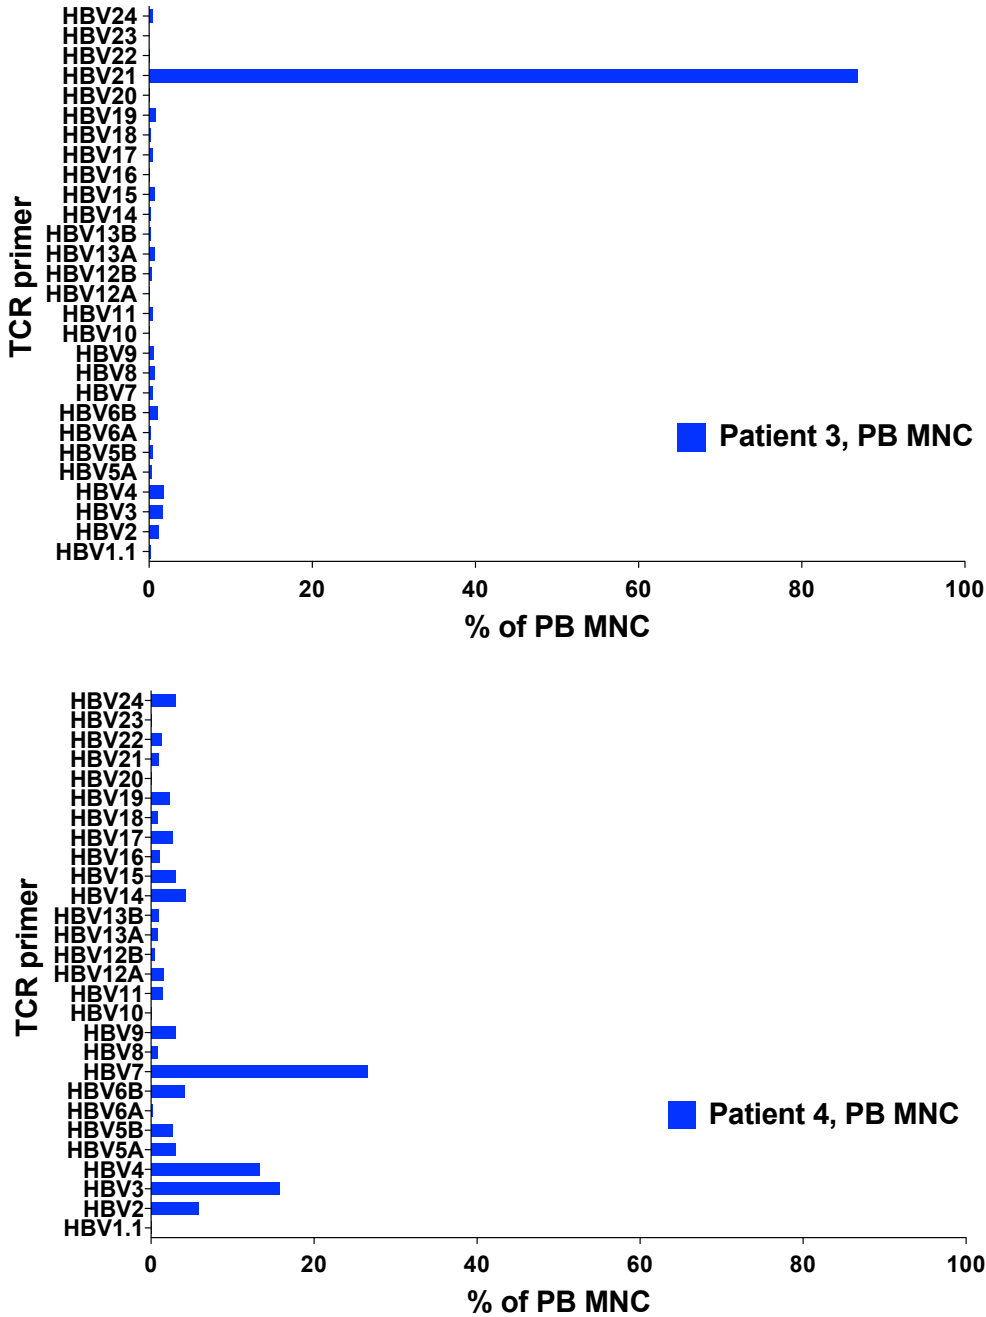

**Supplementary Figure 2. Patients 3 and 4 with STAT5b mutation N642H: T-cell receptor rearrangement RT-PCR results.**

T-cell receptor rearrangement and T-cell clonality in patients 3 and 4 was analyzed using RT-PCR (the method described by Ochsenreither et al. J Transl Med 2008). RNA was derived from PB MNCs of patients 3 and 4. Samples were analyzed with SYBR Green RT-PCR (Life Technologies). The method is semi-quantitative and it can be used to determine clonality in given sample. In patient 3 with CD56+ T-cell LGL leukemia, 86% of PB MNC consisted of a single clone (HBV21). In patient 4 with NK-cell LGL leukemia, there was one expansion of 27% (the average TCR-percent across all probes was 3.6% and a single standard deviation was 5.8%, thus HBV7 is +3SD above average representing abnormal expansion).

## Supplementary Figure 3

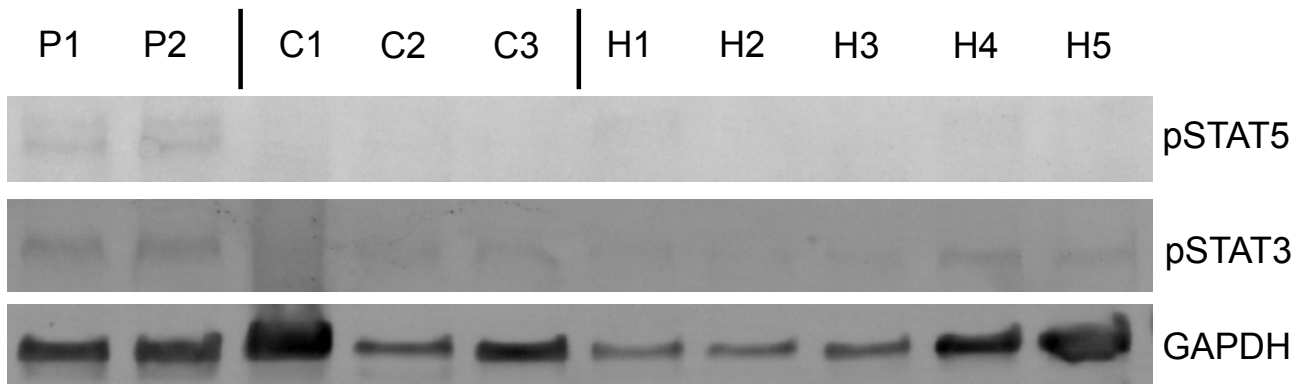

### Supplementary Figure 3. Phospho-STAT3 and phospho-STAT5 western blotting results.

Freshly isolated PB MNC's were sheared into cytosolic and nuclear fractions. We analyzed pSTAT3 and pSTAT5 expression in nuclear fractions using samples from 2 LGL-leukemia patients with STAT5b mutation Y665F (Patients 1-2, Table 1), 3 control LGL-leukemia patients with wild-type STAT3/STAT5b (C1-3) and 5 healthy controls (H1-5). The patients with STAT5b mutation expressed pSTAT5 and to a lesser extent pSTAT3 in nuclear lysates. Other LGL patients or healthy controls did not express pSTAT5.

**Supplementary Table 1. Patient cohort characteristics**

|               | Median age at diagnosis, years (range) | Males         | Treatment *   | Hb, g/l median (range) | WBC, 10 <sup>6</sup> /l median (range) | Lymph, 10 <sup>6</sup> /l median (range) |
|---------------|----------------------------------------|---------------|---------------|------------------------|----------------------------------------|------------------------------------------|
| T-LGL (n=173) | 65 (17-89)                             | 103/173 (60%) | 115/173 (66%) | 118 (59-172)           | 6.1 (0.8-90)                           | 3.4 (0.4-85.5)                           |
| NK-LGL (n=38) | 60 (27-77)                             | 25/38 (66%)   | 18/38 (47%)   | 129 (58-168)           | 9.9 (1.8-164.7)                        | 6.8 (1.0-131.8)                          |
| Total (n=211) | 64 (17-89)                             | 128/211 (61%) | 133/211 (63%) | 121 (58-172)           | 6.5 (0.8-164.7)                        | 3.7 (0.4-131.8)                          |

\*Treatment at any timepoint

Abbreviations: Hb, hemoglobin; WBC, white blood cell count; Lymph, lymphocytes

## Supplementary Table 2. Capillary sequencing primers

| Primer name         | Primer sequence                  |
|---------------------|----------------------------------|
| STAT5a_exon15_16_F  | 5'-GCCCTGACTCGGGGGTTCCT-3'       |
| STAT5a_exon15_16_R  | 5'-GTGGCGGGGCAAGGGAACAA-3'       |
| STAT5a_exon_18_19_F | 5'-ACATGGGGCGTGGGCTTCCA-3'       |
| STAT5a_exon_18_19_R | 5'-GCCAGCCCTCCAGGAGTCCA-3'       |
| STAT5b_exon_14_15_F | 5'-AGGCGGGGATATTTGTATGCCTCT-3'   |
| STAT5b_exon_14_15_R | 5'-TGTTTCATGTGTAACCATGCTGCCAT-3' |
| STAT5b_exon_17_18_F | 5'-AGGTGGTTGTGTTCTGTCCT-3'       |
| STAT5b_exon_17_18_R | 5'-CAGTTCCTCCCCTGTGGAC-3'        |
| BMPR2_F             | 5'-GGGAGTGTCTCCAGAATTTGGCT-3'    |
| BMPR2_R             | 5'-ACGGCAAACCTTACCTCCAACAGTTT-3' |
| EBF3_F              | 5'-CACCGCGCTGCTTCGAGCTA-3'       |
| EBF3_R              | 5'-GCGCAGAAAAGGAGAGCCAGC-3'      |
| SGMS2_F             | 5'-TTTCATTAGGAGTAAAACCAACCA-3'   |
| SGMS2_R             | 5'-CATTGTAATGCAGCGATACAGG-3'     |

**Supplementary Table 3. Locus specific primer sequences carrying tails corresponding to the Illumina adapter sequences. Locus specific primer sequences are underlined.**

| <b>Primer name</b> | <b>Primer sequence</b>                                             |
|--------------------|--------------------------------------------------------------------|
| STAT5B_exon16-F    | 5'-ACACTCTTCCCTACACGACGCTCTCCGATCT <u>TGTTGGGGTTTTAAGATTCC</u> -3' |
| STAT5B_exon16-R    | 5'-AGACGTGTGCTCTTCCGATCT <u>CAAATCAGAATGCGAACATTG</u> -3'          |
| STAT5A_exon17-F    | 5'-ACACTCTTCCCTACACGACGCTCTCCGATCT <u>TCCTGCTGCTGGTGGATTAT</u> -3' |
| STAT5A_exon17-R    | 5'-AGACGTGTGCTCTTCCGATCT <u>AGCCCAAGGCTTGTCTATG</u> -3'            |

**Supplementary Table 4. Illumina TruSeq Adapter primer sequences. TruSeq Adapter index primers (indices 1-48) are adapted from Illumina, rest of the index primers (FIMM 61-100) contain non-Illumina indices. Index sequences are underlined.**

| Primer name              | Primer sequence                                                                   |
|--------------------------|-----------------------------------------------------------------------------------|
| TruSeq Universal Adapter | 5'-AATGATACGGCGACCACCGAGATCTACACTCTTCCCTACACGACGCTCTTCCGATC*T-3'                  |
| TruSeq Adapter index 1   | 5'-CAAGCAGAAGACGGCATAACGAGAT <u>CGTGATGTGACTGGAGTTCAGACGTGTGCTCTTCCGATC</u> *T-3' |
| TruSeq Adapter index 2   | 5'-CAAGCAGAAGACGGCATAACGAGAT <u>ACATCGGTGACTGGAGTTCAGACGTGTGCTCTTCCGATC</u> *T-3' |
| TruSeq Adapter index 3   | 5'-CAAGCAGAAGACGGCATAACGAGAT <u>GCCTAAGTGACTGGAGTTCAGACGTGTGCTCTTCCGATC</u> *T-3' |
| TruSeq Adapter index 4   | 5'-CAAGCAGAAGACGGCATAACGAGAT <u>TGGTCAGTGACTGGAGTTCAGACGTGTGCTCTTCCGATC</u> *T-3' |
| TruSeq Adapter index 5   | 5'-CAAGCAGAAGACGGCATAACGAGAT <u>ACTGTGTGACTGGAGTTCAGACGTGTGCTCTTCCGATC</u> *T-3'  |
| TruSeq Adapter index 6   | 5'-CAAGCAGAAGACGGCATAACGAGAT <u>ATTGGCGTGACTGGAGTTCAGACGTGTGCTCTTCCGATC</u> *T-3' |
| TruSeq Adapter index 7   | 5'-CAAGCAGAAGACGGCATAACGAGAT <u>GATCTGGTGACTGGAGTTCAGACGTGTGCTCTTCCGATC</u> *T-3' |
| TruSeq Adapter index 8   | 5'-CAAGCAGAAGACGGCATAACGAGAT <u>TCAAGTGTGACTGGAGTTCAGACGTGTGCTCTTCCGATC</u> *T-3' |
| TruSeq Adapter index 9   | 5'-CAAGCAGAAGACGGCATAACGAGAT <u>CTGATCGTGACTGGAGTTCAGACGTGTGCTCTTCCGATC</u> *T-3' |
| TruSeq Adapter index 10  | 5'-CAAGCAGAAGACGGCATAACGAGAT <u>AAGCTAGTGACTGGAGTTCAGACGTGTGCTCTTCCGATC</u> *T-3' |
| TruSeq Adapter index 11  | 5'-CAAGCAGAAGACGGCATAACGAGAT <u>GTAGCCGTGACTGGAGTTCAGACGTGTGCTCTTCCGATC</u> *T-3' |
| TruSeq Adapter index 12  | 5'-CAAGCAGAAGACGGCATAACGAGAT <u>TACAAGGTGACTGGAGTTCAGACGTGTGCTCTTCCGATC</u> *T-3' |
| TruSeq Adapter index 13  | 5'-CAAGCAGAAGACGGCATAACGAGAT <u>TTGACTGTGACTGGAGTTCAGACGTGTGCTCTTCCGATC</u> *T-3' |

|                         |                                                                                    |
|-------------------------|------------------------------------------------------------------------------------|
| TruSeq Adapter index 14 | 5'-CAAGCAGAAGACGGCATAACGAGAT <u>GGA</u> ACTGTGACTGGAGTTCAGACGTGTGCTCTTCCGATC*T-3'  |
| TruSeq Adapter index 15 | 5'-CAAGCAGAAGACGGCATAACGAGAT <u>TGAC</u> ATGTGACTGGAGTTCAGACGTGTGCTCTTCCGATC*T-3'  |
| TruSeq Adapter index 16 | 5'-CAAGCAGAAGACGGCATAACGAGAT <u>GACGG</u> TGACTGGAGTTCAGACGTGTGCTCTTCCGATC*T-3'    |
| TruSeq Adapter index 17 | 5'-CAAGCAGAAGACGGCATAACGAGAT <u>CTCTAC</u> GTGACTGGAGTTCAGACGTGTGCTCTTCCGATC*T-3'  |
| TruSeq Adapter index 18 | 5'-CAAGCAGAAGACGGCATAACGAGAT <u>GCGGAC</u> GTGACTGGAGTTCAGACGTGTGCTCTTCCGATC*T-3'  |
| TruSeq Adapter index 19 | 5'-CAAGCAGAAGACGGCATAACGAGAT <u>TTTTCAC</u> GTGACTGGAGTTCAGACGTGTGCTCTTCCGATC*T-3' |
| TruSeq Adapter index 20 | 5'-CAAGCAGAAGACGGCATAACGAGAT <u>GGCCAC</u> GTGACTGGAGTTCAGACGTGTGCTCTTCCGATC*T-3'  |
| TruSeq Adapter index 21 | 5'-CAAGCAGAAGACGGCATAACGAGAT <u>CGAAAC</u> GTGACTGGAGTTCAGACGTGTGCTCTTCCGATC*T-3'  |
| TruSeq Adapter index 22 | 5'-CAAGCAGAAGACGGCATAACGAGAT <u>CGTACGG</u> TGACTGGAGTTCAGACGTGTGCTCTTCCGATC*T-3'  |
| TruSeq Adapter index 23 | 5'-CAAGCAGAAGACGGCATAACGAGAT <u>CCACTC</u> GTGACTGGAGTTCAGACGTGTGCTCTTCCGATC*T-3'  |
| TruSeq Adapter index 24 | 5'-CAAGCAGAAGACGGCATAACGAGAT <u>GCTACCG</u> TGACTGGAGTTCAGACGTGTGCTCTTCCGATC*T-3'  |
| TruSeq Adapter index 25 | 5'-CAAGCAGAAGACGGCATAACGAGAT <u>AGCTAGG</u> TGACTGGAGTTCAGACGTGTGCTCTTCCGATC*T-3'  |
| TruSeq Adapter index 26 | 5'-CAAGCAGAAGACGGCATAACGAGAT <u>GCTCATG</u> TGACTGGAGTTCAGACGTGTGCTCTTCCGATC*T-3'  |
| TruSeq Adapter index 27 | 5'-CAAGCAGAAGACGGCATAACGAGAT <u>GTATAGG</u> TGACTGGAGTTCAGACGTGTGCTCTTCCGATC*T-3'  |
| TruSeq Adapter index 28 | 5'-CAAGCAGAAGACGGCATAACGAGAT <u>TCTGAGG</u> TGACTGGAGTTCAGACGTGTGCTCTTCCGATC*T-3'  |
| TruSeq Adapter index 29 | 5'-CAAGCAGAAGACGGCATAACGAGAT <u>CAGCAGG</u> TGACTGGAGTTCAGACGTGTGCTCTTCCGATC*T-3'  |
| TruSeq Adapter index 30 | 5'-CAAGCAGAAGACGGCATAACGAGAT <u>CGATTAG</u> TGACTGGAGTTCAGACGTGTGCTCTTCCGATC*T-3'  |



|                         |                                                                                   |
|-------------------------|-----------------------------------------------------------------------------------|
| TruSeq Adapter index 31 | 5'-CAAGCAGAAGACGGCATAACGAGAT <u>GCTGTAGT</u> GACTGGAGTTCAGACGTGTGCTCTCCGATC*T-3'  |
| TruSeq Adapter index 32 | 5'-CAAGCAGAAGACGGCATAACGAGAT <u>ATTATAGT</u> GACTGGAGTTCAGACGTGTGCTCTCCGATC*T-3'  |
| TruSeq Adapter index 33 | 5'-CAAGCAGAAGACGGCATAACGAGAT <u>GAAATGAGT</u> GACTGGAGTTCAGACGTGTGCTCTCCGATC*T-3' |
| TruSeq Adapter index 34 | 5'-CAAGCAGAAGACGGCATAACGAGAT <u>TCGGGAGT</u> GACTGGAGTTCAGACGTGTGCTCTCCGATC*T-3'  |
| TruSeq Adapter index 35 | 5'-CAAGCAGAAGACGGCATAACGAGAT <u>CTTCGAGT</u> GACTGGAGTTCAGACGTGTGCTCTCCGATC*T-3'  |
| TruSeq Adapter index 36 | 5'-CAAGCAGAAGACGGCATAACGAGAT <u>TGCCGAGT</u> GACTGGAGTTCAGACGTGTGCTCTCCGATC*T-3'  |
| TruSeq Adapter index 37 | 5'-CAAGCAGAAGACGGCATAACGAGAT <u>CGCGGCGT</u> GACTGGAGTTCAGACGTGTGCTCTCCGATC*T-3'  |
| TruSeq Adapter index 38 | 5'-CAAGCAGAAGACGGCATAACGAGAT <u>TAAGGCGT</u> GACTGGAGTTCAGACGTGTGCTCTCCGATC*T-3'  |
| TruSeq Adapter index 39 | 5'-CAAGCAGAAGACGGCATAACGAGAT <u>TGGAGCGT</u> GACTGGAGTTCAGACGTGTGCTCTCCGATC*T-3'  |
| TruSeq Adapter index 40 | 5'-CAAGCAGAAGACGGCATAACGAGAT <u>TGTGCCGT</u> GACTGGAGTTCAGACGTGTGCTCTCCGATC*T-3'  |
| TruSeq Adapter index 41 | 5'-CAAGCAGAAGACGGCATAACGAGAT <u>CAGGCCGT</u> GACTGGAGTTCAGACGTGTGCTCTCCGATC*T-3'  |
| TruSeq Adapter index 42 | 5'-CAAGCAGAAGACGGCATAACGAGAT <u>GGTAGAGT</u> GACTGGAGTTCAGACGTGTGCTCTCCGATC*T-3'  |
| TruSeq Adapter index 43 | 5'-CAAGCAGAAGACGGCATAACGAGAT <u>CATTCAGT</u> GACTGGAGTTCAGACGTGTGCTCTCCGATC*T-3'  |
| TruSeq Adapter index 44 | 5'-CAAGCAGAAGACGGCATAACGAGAT <u>ATGGCAGT</u> GACTGGAGTTCAGACGTGTGCTCTCCGATC*T-3'  |
| TruSeq Adapter index 45 | 5'-CAAGCAGAAGACGGCATAACGAGAT <u>CCAGCAGT</u> GACTGGAGTTCAGACGTGTGCTCTCCGATC*T-3'  |
| TruSeq Adapter index 46 | 5'-CAAGCAGAAGACGGCATAACGAGAT <u>TGCGCCAGT</u> GACTGGAGTTCAGACGTGTGCTCTCCGATC*T-3' |
| TruSeq Adapter index 47 | 5'-CAAGCAGAAGACGGCATAACGAGAT <u>TCGAAAGT</u> GACTGGAGTTCAGACGTGTGCTCTCCGATC*T-3'  |

|                         |                                                                                    |
|-------------------------|------------------------------------------------------------------------------------|
| TruSeq Adapter index 48 | 5'-CAAGCAGAAGACGGCATAACGAGAT <u>GGAGAA</u> GTGACTGGAGTTCAGACGTGTGCTCTTCCGATC*T-3'  |
| TruSeq Adapter FIMM 61  | 5'-CAAGCAGAAGACGGCATAACGAGATA <u>AACGAT</u> GTGACTGGAGTTCAGACGTGTGCTCTTCCGATC*T-3' |
| TruSeq Adapter FIMM 62  | 5'-CAAGCAGAAGACGGCATAACGAGATA <u>AATCGA</u> GTGACTGGAGTTCAGACGTGTGCTCTTCCGATC*T-3' |
| TruSeq Adapter FIMM 63  | 5'-CAAGCAGAAGACGGCATAACGAGATA <u>ACACTT</u> GTGACTGGAGTTCAGACGTGTGCTCTTCCGATC*T-3' |
| TruSeq Adapter FIMM 64  | 5'-CAAGCAGAAGACGGCATAACGAGATA <u>ACCACC</u> GTGACTGGAGTTCAGACGTGTGCTCTTCCGATC*T-3' |
| TruSeq Adapter FIMM 65  | 5'-CAAGCAGAAGACGGCATAACGAGATA <u>ACCTTA</u> GTGACTGGAGTTCAGACGTGTGCTCTTCCGATC*T-3' |
| TruSeq Adapter FIMM 66  | 5'-CAAGCAGAAGACGGCATAACGAGATA <u>ACGCGA</u> GTGACTGGAGTTCAGACGTGTGCTCTTCCGATC*T-3' |
| TruSeq Adapter FIMM 67  | 5'-CAAGCAGAAGACGGCATAACGAGATA <u>ACTAGA</u> GTGACTGGAGTTCAGACGTGTGCTCTTCCGATC*T-3' |
| TruSeq Adapter FIMM 68  | 5'-CAAGCAGAAGACGGCATAACGAGATA <u>AGAACT</u> GTGACTGGAGTTCAGACGTGTGCTCTTCCGATC*T-3' |
| TruSeq Adapter FIMM 69  | 5'-CAAGCAGAAGACGGCATAACGAGATA <u>AGACTA</u> GTGACTGGAGTTCAGACGTGTGCTCTTCCGATC*T-3' |
| TruSeq Adapter FIMM 70  | 5'-CAAGCAGAAGACGGCATAACGAGATA <u>AGCAAT</u> GTGACTGGAGTTCAGACGTGTGCTCTTCCGATC*T-3' |
| TruSeq Adapter FIMM 71  | 5'-CAAGCAGAAGACGGCATAACGAGATA <u>AGCGAC</u> GTGACTGGAGTTCAGACGTGTGCTCTTCCGATC*T-3' |
| TruSeq Adapter FIMM 72  | 5'-CAAGCAGAAGACGGCATAACGAGATA <u>AGGATT</u> GTGACTGGAGTTCAGACGTGTGCTCTTCCGATC*T-3' |
| TruSeq Adapter FIMM 73  | 5'-CAAGCAGAAGACGGCATAACGAGATA <u>AGTAGT</u> GTGACTGGAGTTCAGACGTGTGCTCTTCCGATC*T-3' |
| TruSeq Adapter FIMM 74  | 5'-CAAGCAGAAGACGGCATAACGAGATA <u>AGTGCG</u> GTGACTGGAGTTCAGACGTGTGCTCTTCCGATC*T-3' |
| TruSeq Adapter FIMM 75  | 5'-CAAGCAGAAGACGGCATAACGAGATA <u>ATAACG</u> GTGACTGGAGTTCAGACGTGTGCTCTTCCGATC*T-3' |
| TruSeq Adapter FIMM 76  | 5'-CAAGCAGAAGACGGCATAACGAGATA <u>ATAGCA</u> GTGACTGGAGTTCAGACGTGTGCTCTTCCGATC*T-3' |

|                        |                                                                                  |
|------------------------|----------------------------------------------------------------------------------|
| TruSeq Adapter FIMM 77 | 5'-CAAGCAGAAGACGGCATAACGAGAT <u>ATCTTGGT</u> GACTGGAGTTCAGACGTGTGCTCTCCGATC*T-3' |
| TruSeq Adapter FIMM 78 | 5'-CAAGCAGAAGACGGCATAACGAGAT <u>ATGATGGT</u> GACTGGAGTTCAGACGTGTGCTCTCCGATC*T-3' |
| TruSeq Adapter FIMM 79 | 5'-CAAGCAGAAGACGGCATAACGAGAT <u>CAAGGC</u> GTGACTGGAGTTCAGACGTGTGCTCTCCGATC*T-3' |
| TruSeq Adapter FIMM 80 | 5'-CAAGCAGAAGACGGCATAACGAGAT <u>CAGACGGT</u> GACTGGAGTTCAGACGTGTGCTCTCCGATC*T-3' |
| TruSeq Adapter FIMM 81 | 5'-CAAGCAGAAGACGGCATAACGAGAT <u>CAGCGAGT</u> GACTGGAGTTCAGACGTGTGCTCTCCGATC*T-3' |
| TruSeq Adapter FIMM 82 | 5'-CAAGCAGAAGACGGCATAACGAGAT <u>CATGAA</u> GTGACTGGAGTTCAGACGTGTGCTCTCCGATC*T-3' |
| TruSeq Adapter FIMM 83 | 5'-CAAGCAGAAGACGGCATAACGAGAT <u>CCAGCT</u> GTGACTGGAGTTCAGACGTGTGCTCTCCGATC*T-3' |
| TruSeq Adapter FIMM 84 | 5'-CAAGCAGAAGACGGCATAACGAGAT <u>CCTAGC</u> GTGACTGGAGTTCAGACGTGTGCTCTCCGATC*T-3' |
| TruSeq Adapter FIMM 85 | 5'-CAAGCAGAAGACGGCATAACGAGAT <u>CGATAA</u> GTGACTGGAGTTCAGACGTGTGCTCTCCGATC*T-3' |
| TruSeq Adapter FIMM 86 | 5'-CAAGCAGAAGACGGCATAACGAGAT <u>CGCATC</u> GTGACTGGAGTTCAGACGTGTGCTCTCCGATC*T-3' |
| TruSeq Adapter FIMM 87 | 5'-CAAGCAGAAGACGGCATAACGAGAT <u>CGGATGGT</u> GACTGGAGTTCAGACGTGTGCTCTCCGATC*T-3' |
| TruSeq Adapter FIMM 88 | 5'-CAAGCAGAAGACGGCATAACGAGAT <u>CGTGTC</u> GTGACTGGAGTTCAGACGTGTGCTCTCCGATC*T-3' |
| TruSeq Adapter FIMM 89 | 5'-CAAGCAGAAGACGGCATAACGAGAT <u>CTACCG</u> GTGACTGGAGTTCAGACGTGTGCTCTCCGATC*T-3' |
| TruSeq Adapter FIMM 90 | 5'-CAAGCAGAAGACGGCATAACGAGAT <u>CTCCAG</u> GTGACTGGAGTTCAGACGTGTGCTCTCCGATC*T-3' |
| TruSeq Adapter FIMM 91 | 5'-CAAGCAGAAGACGGCATAACGAGAT <u>CTGAGGGT</u> GACTGGAGTTCAGACGTGTGCTCTCCGATC*T-3' |
| TruSeq Adapter FIMM 92 | 5'-CAAGCAGAAGACGGCATAACGAGAT <u>CTTAGT</u> GTGACTGGAGTTCAGACGTGTGCTCTCCGATC*T-3' |
| TruSeq Adapter FIMM 93 | 5'-CAAGCAGAAGACGGCATAACGAGAT <u>GAACTA</u> GTGACTGGAGTTCAGACGTGTGCTCTCCGATC*T-3' |

|                               |                                                                                    |
|-------------------------------|------------------------------------------------------------------------------------|
| TruSeq<br>Adapter<br>FIMM 94  | 5'-CAAGCAGAAGACGGCATAACGAGAT <u>GAATTGGT</u> GACTGGAGTTCAGACGTGTGCTCTTCCGATC*T-3'  |
| TruSeq<br>Adapter<br>FIMM 95  | 5'-CAAGCAGAAGACGGCATAACGAGAT <u>GAGATTGT</u> GACTGGAGTTCAGACGTGTGCTCTTCCGATC*T-3'  |
| TruSeq<br>Adapter<br>FIMM 96  | 5'-CAAGCAGAAGACGGCATAACGAGAT <u>GCAAGTGGT</u> GACTGGAGTTCAGACGTGTGCTCTTCCGATC*T-3' |
| TruSeq<br>Adapter<br>FIMM 97  | 5'-CAAGCAGAAGACGGCATAACGAGAT <u>GCGTCTGT</u> GACTGGAGTTCAGACGTGTGCTCTTCCGATC*T-3'  |
| TruSeq<br>Adapter<br>FIMM 98  | 5'-CAAGCAGAAGACGGCATAACGAGAT <u>GCTGTCGT</u> GACTGGAGTTCAGACGTGTGCTCTTCCGATC*T-3'  |
| TruSeq<br>Adapter<br>FIMM 99  | 5'-CAAGCAGAAGACGGCATAACGAGAT <u>GGAGTCGT</u> GACTGGAGTTCAGACGTGTGCTCTTCCGATC*T-3'  |
| TruSeq<br>Adapter<br>FIMM 100 | 5'-CAAGCAGAAGACGGCATAACGAGAT <u>GTATGAGT</u> GACTGGAGTTCAGACGTGTGCTCTTCCGATC*T-3'  |

\* denotes a phosphorothioate-modified bond

<sup>1</sup> Oligonucleotide sequences © 200-2012 Illumina, Inc. All rights reserved. Derivative works created by Illumina customers are authorized for use with Illumina instruments and products only. All other uses are strictly prohibited.

### Supplementary Table 5. STAT5b mutagenesis primers

| Primer name                      | Primer sequence                                             |
|----------------------------------|-------------------------------------------------------------|
| STAT5b_mutagenesis_Y665F_F       | 5'- GAG ACT TGA ATT <b>T</b> CC TTA TCT ACG TGT TTC -3'     |
| STAT5b_mutagenesis_Y665F_R       | 5'- GAA ACA CGT AGA TAA GG <b>A</b> AAT TCA AGT CTC -3'     |
| STAT5b_mutagenesis_N642H_F       | 5'- GAA AGA ATG TTT TGG <b>C</b> AT CTG ATG CCT TTT AC -3'  |
| STAT5b_mutagenesis_N642H_R       | 5'- GTA AAA GGC ATC AGA <b>T</b> G C CAA AAC ATT CTT TC -3' |
| STAT5b_mutagenesis_sequencing_F1 | 5'- GGACTTTCCAAAATGTTCG-3'                                  |
| STAT5b_mutagenesis_sequencing_F2 | 5'- GAACAGAGGTTGGTCCGAGA-3'                                 |
| STAT5b_mutagenesis_sequencing_F3 | 5'- GTCACGCAGGACACAGAGAA-3'                                 |
| STAT5b_mutagenesis_sequencing_F4 | 5'- GAACACCCGCAATGATTACA-3'                                 |
| STAT5b_mutagenesis_sequencing_F5 | 5'- CAACAGGCCCATGACCTACT-3'                                 |
| STAT5b_mutagenesis_sequencing_R  | 5'- CCACCAGCCTTGTCTAAT-3'                                   |

**Supplementary Table 6. Mutations in *STAT5b* detected by Amplicon sequencing**

| No | Gene   | Chr | Position | Mut. type                 | Var. base | Ref. base | Var. Freq (%)* | Coverage ** | Protein |
|----|--------|-----|----------|---------------------------|-----------|-----------|----------------|-------------|---------|
| 3  | STAT5b | 17  | 40359729 | Missense,<br>homozygous   | G         | T         | 94             | 480         | N642H   |
| 4  | STAT5b | 17  | 40359729 | Missense,<br>heterozygous | G         | T         | 48             | 942         | N642H   |

Abbreviations: No, number; Chr, chromosome; Var\_base, variant base; Ref\_base, reference base; Var. Freq, variant frequency

\*The percentage of variant bases at the site of the mutation

\*\* The number of reads aligned to the reference genome at the site of the mutation

**Supplementary Table 7. Gene expression levels in LGL leukemia patients with STAT5b Y665F mutation versus healthy control CD8+ RNA. The top genes with expression fold change over 2.5 or under 2.5 (log<sub>10</sub>-scale) are displayed.**

| Gene         | Description                                                                                                    | P-value  | Fold change (log <sub>10</sub> ) |
|--------------|----------------------------------------------------------------------------------------------------------------|----------|----------------------------------|
| CX3CR1       | chemokine (C-X3-C motif) receptor 1                                                                            | 0,005588 | 4,965                            |
| PRF1         | perforin 1 (pore forming protein)                                                                              | 0,004729 | 3,41                             |
| GIMAP4       | GTPase, IMAP family member 4                                                                                   | 0,003885 | 3,375                            |
| SLC1A7       | solute carrier family 1 (glutamate transporter), member 7                                                      | 0,01883  | 3,16                             |
| LAIR2        | leukocyte-associated immunoglobulin-like receptor 2                                                            | 0,00749  | 3,075                            |
| FGR          | Gardner-Rasheed feline sarcoma viral (v-fgr) oncogene homolog                                                  | 0,003885 | 3,055                            |
| RAP2A        | RAP2A, member of RAS oncogene family                                                                           | 0,010534 | 3,02                             |
| PCMT1        | protein-L-isoaspartate (D-aspartate) O-methyltransferase                                                       | 0,003885 | 2,93                             |
| RAB10        | RAB10, member RAS oncogene family                                                                              | 0,003885 | 2,9                              |
| PRR5L        | proline rich 5 like                                                                                            | 0,004098 | 2,89                             |
| BATF         | basic leucine zipper transcription factor, ATF-like                                                            | 0,020192 | 2,84                             |
| DCAF7        | DDB1 and CUL4 associated factor 7                                                                              | 0,003885 | 2,825                            |
| AKR1C3       | aldo-keto reductase family 1, member C3 (3-alpha hydroxysteroid dehydrogenase, type II)                        | 0,005109 | 2,81                             |
| PTGER2       | prostaglandin E receptor 2 (subtype EP2), 53kDa                                                                | 0,005702 | 2,805                            |
| PLEK         | pleckstrin                                                                                                     | 0,003909 | 2,8                              |
| FGL2         | fibrinogen-like 2                                                                                              | 0,015298 | 2,795                            |
| LOC100130633 | hypothetical protein LOC100130633                                                                              | 0,003982 | 2,785                            |
| B4GALT5      | UDP-Gal:betaGlcNAc beta 1,4- galactosyltransferase, polypeptide 5                                              | 0,008053 | 2,745                            |
| KLRD1        | killer cell lectin-like receptor subfamily D, member 1                                                         | 0,005251 | 2,735                            |
| ERBB2        | v-erb-b2 erythroblastic leukemia viral oncogene homolog 2, neuro/glioblastoma derived oncogene homolog (avian) | 0,027067 | 2,675                            |
| ITGB1        | integrin, beta 1 (fibronectin receptor, beta polypeptide, antigen CD29 includes MDF2, MSK12)                   | 0,005244 | 2,675                            |
| KLRG1        | killer cell lectin-like receptor subfamily G, member 1                                                         | 0,020797 | 2,65                             |
| PTGDR        | prostaglandin D2 receptor (DP)                                                                                 | 0,009879 | 2,64                             |
| PLEKHG3      | pleckstrin homology domain containing, family G (with RhoGef domain) member 3                                  | 0,006436 | 2,625                            |
| GZMB         | granzyme B (granzyme 2, cytotoxic T-lymphocyte-associated serine esterase 1)                                   | 0,021429 | 2,61                             |
| APOBEC3G     | apolipoprotein B mRNA editing enzyme, catalytic polypeptide-like 3G                                            | 0,004159 | 2,57                             |
| PYHIN1       | pyrin and HIN domain family, member 1                                                                          | 0,021803 | 2,555                            |
| KLRF1        | killer cell lectin-like receptor subfamily F, member 1                                                         | 0,003885 | 2,555                            |
| CCDC56       | coiled-coil domain containing 56                                                                               | 0,003885 | 2,53                             |
| LTB          | lymphotoxin beta (TNF superfamily, member 3)                                                                   | 0,014099 | -2,51                            |
| TRAF3IP2     | TRAF3 interacting protein 2                                                                                    | 0,003885 | -2,51                            |
| MAFF         | v-maf musculoaponeurotic fibrosarcoma oncogene homolog F (avian)                                               | 0,01022  | -2,52                            |
| TSPYL2       | TSPY-like 2                                                                                                    | 0,007409 | -2,56                            |
| PASK         | PAS domain containing serine/threonine kinase                                                                  | 0,006749 | -2,585                           |
| CD83         | CD83 molecule                                                                                                  | 0,003885 | -2,595                           |
| ACTN1        | actinin, alpha 1                                                                                               | 0,035869 | -2,615                           |
| CENPV        | centromere protein V                                                                                           | 0,005118 | -2,615                           |
| NR4A2        | nuclear receptor subfamily 4, group A, member 2                                                                | 0,028072 | -2,625                           |

|         |                                                             |          |        |
|---------|-------------------------------------------------------------|----------|--------|
| LEF1    | lymphoid enhancer-binding factor 1                          | 0,016946 | -2,66  |
| SGK1    | serum/glucocorticoid regulated kinase 1                     | 0,029676 | -2,72  |
| PDE4B   | phosphodiesterase 4B, cAMP-specific                         | 0,020235 | -2,78  |
| INF2    | inverted formin, FH2 and WH2 domain containing              | 0,008284 | -2,8   |
| SPINT2  | serine peptidase inhibitor, Kunitz type, 2                  | 0,003924 | -2,84  |
| TNF     | tumor necrosis factor                                       | 0,003885 | -2,925 |
| SIK1    | salt-inducible kinase 1                                     | 0,013065 | -2,96  |
| TNFAIP3 | tumor necrosis factor, alpha-induced protein 3              | 0,004795 | -2,97  |
| IRS2    | insulin receptor substrate 2                                | 0,004962 | -2,995 |
| SPRY1   | sprouty homolog 1, antagonist of FGF signaling (Drosophila) | 0,003885 | -3,005 |
| CSRNP1  | cysteine-serine-rich nuclear protein 1                      | 0,048419 | -3,025 |
| TCEA3   | transcription elongation factor A (SII), 3                  | 0,005611 | -3,045 |
| RGS1    | regulator of G-protein signaling 1                          | 0,006621 | -3,305 |
| KLRB1   | killer cell lectin-like receptor subfamily B, member 1      | 0,003885 | -3,34  |
| NELL2   | NEL-like 2 (chicken)                                        | 0,00828  | -3,415 |
| CCR7    | chemokine (C-C motif) receptor 7                            | 0,01742  | -3,44  |
| MAL     | mal, T-cell differentiation protein                         | 0,003924 | -3,48  |
| IL8     | interleukin 8                                               | 0,013286 | -3,675 |



**Supplementary Table 8. Over-represented signaling pathways (KEGG database) in *STAT5b* Y665F mutated patients compared to healthy control CD8+ RNA**

| KEGG - test for over-representation |           |               |                  |                 |              |             |                                                                            |
|-------------------------------------|-----------|---------------|------------------|-----------------|--------------|-------------|----------------------------------------------------------------------------|
|                                     | <b>ID</b> | <b>Pvalue</b> | <b>OddsRatio</b> | <b>ExpCount</b> | <b>Count</b> | <b>Size</b> | <b>Term</b>                                                                |
| 1                                   | 03010     | 0             | 4.87             | 17.93           | 48           | 88          | <a href="#">Ribosome</a>                                                   |
| 2                                   | 04141     | 0             | 2.47             | 31.18           | 58           | 153         | <a href="#">Protein processing in endoplasmic reticulum</a>                |
| 3                                   | 05131     | 2e-06         | 3.61             | 12.43           | 29           | 61          | <a href="#">Shigellosis</a>                                                |
| 4                                   | 03040     | 2e-06         | 2.57             | 24.05           | 46           | 118         | <a href="#">Spliceosome</a>                                                |
| 5                                   | 03020     | 9.1e-05       | 5.03             | 5.09            | 14           | 25          | <a href="#">RNA polymerase</a>                                             |
| 6                                   | 04660     | 0.000187      | 2.24             | 20.38           | 36           | 100         | <a href="#">T cell receptor signaling pathway</a>                          |
| 7                                   | 00510     | 0.000215      | 3.17             | 9.17            | 20           | 45          | <a href="#">N-Glycan biosynthesis</a>                                      |
| 8                                   | 03050     | 0.000309      | 3.04             | 9.37            | 20           | 46          | <a href="#">Proteasome</a>                                                 |
| 9                                   | 05220     | 0.000378      | 2.52             | 13.65           | 26           | 67          | <a href="#">Chronic myeloid leukemia</a>                                   |
| 10                                  | 04110     | 0.00046       | 1.99             | 25.07           | 41           | 123         | <a href="#">Cell cycle</a>                                                 |
| 11                                  | 04623     | 0.000939      | 2.78             | 9.37            | 19           | 46          | <a href="#">Cytosolic DNA-sensing pathway</a>                              |
| 12                                  | 05212     | 0.001115      | 2.38             | 13.04           | 24           | 64          | <a href="#">Pancreatic cancer</a>                                          |
| 13                                  | 00071     | 0.00131       | 3.01             | 7.54            | 16           | 37          | <a href="#">Fatty acid metabolism</a>                                      |
| 14                                  | 04710     | 0.001824      | 3.94             | 4.48            | 11           | 22          | <a href="#">Circadian rhythm - mammal</a>                                  |
| 15                                  | 00520     | 0.002241      | 2.68             | 8.56            | 17           | 42          | <a href="#">Amino sugar and nucleotide sugar metabolism</a>                |
| 16                                  | 05110     | 0.00259       | 2.39             | 10.8            | 20           | 53          | <a href="#">Vibrio cholerae infection</a>                                  |
| 17                                  | 03018     | 0.002875      | 2.31             | 11.62           | 21           | 57          | <a href="#">RNA degradation</a>                                            |
| 18                                  | 01100     | 0.003068      | 1.26             | 209.5           | 242          | 1028        | <a href="#">Metabolic pathways</a>                                         |
| 19                                  | 00280     | 0.003453      | 2.63             | 8.15            | 16           | 40          | <a href="#">Valine, leucine and isoleucine degradation</a>                 |
| 20                                  | 04722     | 0.003463      | 1.79             | 24.25           | 37           | 119         | <a href="#">Neurotrophin signaling pathway</a>                             |
| 21                                  | 04650     | 0.003463      | 1.79             | 24.25           | 37           | 119         | <a href="#">Natural killer cell mediated cytotoxicity</a>                  |
| 22                                  | 04662     | 0.005208      | 2.07             | 13.65           | 23           | 67          | <a href="#">B cell receptor signaling pathway</a>                          |
| 23                                  | 00670     | 0.007789      | 3.93             | 3.26            | 8            | 16          | <a href="#">One carbon pool by folate</a>                                  |
| 24                                  | 05223     | 0.009291      | 2.15             | 10.39           | 18           | 51          | <a href="#">Non-small cell lung cancer</a>                                 |
| 25                                  | 00062     | 0.011242      | 6.54             | 1.63            | 5            | 8           | <a href="#">Fatty acid elongation in mitochondria</a>                      |
| 26                                  | 00240     | 0.011879      | 1.76             | 18.54           | 28           | 91          | <a href="#">Pyrimidine metabolism</a>                                      |
| 27                                  | 00230     | 0.01261       | 1.55             | 31.18           | 43           | 153         | <a href="#">Purine metabolism</a>                                          |
| 28                                  | 05120     | 0.012993      | 1.93             | 13.04           | 21           | 64          | <a href="#">Epithelial cell signaling in Helicobacter pylori infection</a> |
| 29                                  | 05222     | 0.01369       | 1.82             | 15.49           | 24           | 76          | <a href="#">Small cell lung cancer</a>                                     |
| 30                                  | 05215     | 0.013861      | 1.77             | 17.12           | 26           | 84          | <a href="#">Prostate cancer</a>                                            |
| 31                                  | 05100     | 0.015872      | 1.85             | 14.06           | 22           | 69          | <a href="#">Bacterial invasion of epithelial cells</a>                     |
| 32                                  | 05213     | 0.016808      | 2.03             | 10.19           | 17           | 50          | <a href="#">Endometrial cancer</a>                                         |
| 33                                  | 05142     | 0.021662      | 1.67             | 18.54           | 27           | 91          | <a href="#">Chagas disease</a>                                             |
| 34                                  | 04520     | 0.022213      | 1.74             | 15.28           | 23           | 75          | <a href="#">Adherens junction</a>                                          |
| 35                                  | 03420     | 0.023357      | 2.04             | 8.97            | 15           | 44          | <a href="#">Nucleotide excision repair</a>                                 |
| 36                                  | 00563     | 0.030308      | 2.52             | 4.69            | 9            | 23          | <a href="#">Glycosylphosphatidylinositol(GPI)-anchor biosynthesis</a>      |
| 37                                  | 05214     | 0.035864      | 1.74             | 12.64           | 19           | 62          | <a href="#">Glioma</a>                                                     |
| 38                                  | 04130     | 0.038647      | 2.05             | 7.13            | 12           | 35          | <a href="#">SNARE interactions in vesicular transport</a>                  |
| 39                                  | 04621     | 0.042224      | 1.76             | 11.21           | 17           | 55          | <a href="#">NOD-like receptor signaling pathway</a>                        |
| 40                                  | 00190     | 0.042279      | 1.49             | 23.03           | 31           | 113         | <a href="#">Oxidative phosphorylation</a>                                  |
| 41                                  | 05216     | 0.043407      | 2.18             | 5.71            | 10           | 28          | <a href="#">Thyroid cancer</a>                                             |
| 42                                  | 00270     | 0.045874      | 2.06             | 6.52            | 11           | 32          | <a href="#">Cysteine and methionine metabolism</a>                         |
| 43                                  | 04120     | 0.046424      | 1.44             | 26.7            | 35           | 131         | <a href="#">Ubiquitin mediated proteolysis</a>                             |
| 44                                  | 03030     | 0.047596      | 1.96             | 7.34            | 12           | 36          | <a href="#">DNA replication</a>                                            |
